# Supplementary material for: A UV non-hydrogen pure selenite nonlinear optical material for achieving balanced properties through framework-optimized structural transformation
Source: Royal Society of Chemistry journal article supplement (doi:10.1039/d3mh01790g), 2024-01-01
Supplement: d3mh01790g1.pdf [file d3mh01790g1.pdf]

# A UV non-hydrogen pure selenite nonlinear optical material for achieving balanced properties through framework-optimized structural transformation

Peng-Fei Li<sup>a,b</sup>, Chun-Li Hu<sup>a</sup>, Jiang-Gao Mao<sup>a,b</sup>, Fang Kong<sup>\*,a,b</sup>

<sup>a</sup> State Key Laboratory of Structural Chemistry, Fujian Institute of Research on the Structure of Matter, Chinese Academy of Sciences, Fuzhou 350002, P. R. China.

<sup>b</sup> University of Chinese Academy of Sciences, Beijing 100049, P. R. China.

\*Corresponding Authors: kongfang@fjirsm.ac.cn

## Supporting Information

|                                                                                                                                                                                                                           |     |
|---------------------------------------------------------------------------------------------------------------------------------------------------------------------------------------------------------------------------|-----|
| <b>S1. Experimental Section</b> .....                                                                                                                                                                                     | S2  |
| <b>S2. Single-crystal X-ray diffraction</b> .....                                                                                                                                                                         | S4  |
| <b>S3. Computational Method</b> .....                                                                                                                                                                                     | S4  |
| <b>Table S1.</b> Summary of crystal data and structural refinements for NaLu(SeO <sub>3</sub> ) <sub>2</sub> and NaGa(SeO <sub>3</sub> ) <sub>2</sub> .....                                                               | S6  |
| <b>Table S2.</b> Calculated bond valences for NaLu(SeO <sub>3</sub> ) <sub>2</sub> .....                                                                                                                                  | S7  |
| <b>Table S3.</b> The reported non-hydrogen selenite compounds with thermal stability $\geq 400^\circ\text{C}$ .....                                                                                                       | S8  |
| <b>Table S4.</b> The reported non-hydrogen pure selenite NLO crystals with $E_g > 4.2$ eV .....                                                                                                                           | S9  |
| <b>Table S5.</b> State energies (eV) of the lowest conduction band (L-CB) and the highest valence band (H-VB) of NaLu(SeO <sub>3</sub> ) <sub>2</sub> .....                                                               | S10 |
| <b>Table S6.</b> Calculation of the dipole moments of the SeO <sub>3</sub> and the net dipole moment of a unit cell of NaGa(SeO <sub>3</sub> ) <sub>2</sub> and NaLu(SeO <sub>3</sub> ) <sub>2</sub> . (D = Debyes) ..... | S11 |
| <b>Figure S1.</b> Simulated and experimental powder X-ray diffractometer patterns of NaLu(SeO <sub>3</sub> ) <sub>2</sub> .....                                                                                           | S12 |
| <b>Figure S2.</b> The coordination environments of Se(1)O <sub>3</sub> group (a) and Se(2)O <sub>3</sub> (b) in NaLu(SeO <sub>3</sub> ) <sub>2</sub> .....                                                                | S13 |
| <b>Figure S3.</b> The band structure of NaLu(SeO <sub>3</sub> ) <sub>2</sub> .....                                                                                                                                        | S14 |
| <b>Figure S4.</b> The total and partial density of states for NaLu(SeO <sub>3</sub> ) <sub>2</sub> .....                                                                                                                  | S15 |
| <b>Figure S5.</b> Calculated refractive index dispersion curves and the predicted shortest type I phase-matching (PM) SHG wavelength of NaLu(SeO <sub>3</sub> ) <sub>2</sub> .....                                        | S16 |
| <b>References</b> .....                                                                                                                                                                                                   | S17 |

## **S1. Experimental Section**

### **Materials and Instrumentations.**

**All the chemicals** were obtained from commercial sources and used without further purification: SeO<sub>2</sub> (Adamas-beta, 99.999%), Na<sub>2</sub>CO<sub>3</sub> (Adamas-beta, 99.99%), Lu(NO<sub>3</sub>)<sub>3</sub>·6H<sub>2</sub>O (Adamas-beta, 99.99%),.

**Powder X-ray** diffraction (PXRD) patterns of NaLu(SeO<sub>3</sub>)<sub>2</sub> was collected on the Miniflex 600 powder X-ray diffractometer using Cu K $\alpha$  radiation ( $\lambda = 1.54186 \text{ \AA}$ ) at room temperature in the angular range of  $2\theta = 5\text{-}70^\circ$  with a scan step size of  $0.02^\circ$ .

**Microprobe elemental analysis** was carried out with the aid of a field-emission scanning electron microscope (JSM6700F) outfitted with an energy-dispersive X-ray spectroscope (Oxford INCA).

**IR spectra** was carried out on a Magna 750 FT-IR spectrometer using air as background in the range of  $4000\text{--}400 \text{ cm}^{-1}$  with a resolution of  $2 \text{ cm}^{-1}$  at room temperature.

**The UV-vis-NIR spectra** was obtained at  $2000\text{--}200 \text{ nm}$  by a PerkinElmer Lambda 900 spectrophotometer using BaSO<sub>4</sub> as the reference, and the reflection spectra were converted into an absorption spectrum using the Kubelka-Munk function. Absorption data was calculated from the diffuse reflection data by the Kubelka-Munk function:  $\alpha/S = (1-R)^2/2R$ , where  $\alpha$  and S represent the absorption coefficient and the scattering coefficient, respectively. The band gap value can be given by extrapolating the absorption edge to the baseline in the  $\alpha/S$  vs. energy graph<sup>1</sup>.

**Thermogravimetric analyses (TGA)** were measured by Netzsch STA 499C installation. The

samples about 2.0-5.0 mg were placed in alumina crucibles and heated in 20-1200 °C at a rate of 15 °C/min under N<sub>2</sub> atmosphere.

**Powder SHG measurements** were conducted using a modified method of Kurtz and Perry<sup>2</sup>. Irradiation laser ( $\lambda = 1064$  nm) is generated by a Nd:YAG solid-state laser equipped with a Q switch. The NaLu(SeO<sub>3</sub>)<sub>2</sub> pure crystal samples ground into powder were sieved according to seven different particle size ranges (25–45, 45–53, 53–75, 75–105, 105–150, 150–210 and 210–300  $\mu\text{m}$ ). KH<sub>2</sub>PO<sub>4</sub> (KDP) samples in the same size range were also be prepared, which were used as reference. SHG signals oscilloscope traces of NaLu(SeO<sub>3</sub>)<sub>2</sub> and KDP samples in the particle size range (150–210  $\mu\text{m}$ ) were recorded.

**The LIDT measurements** of the NaLu(SeO<sub>3</sub>)<sub>2</sub> crystal samples and KH<sub>2</sub>PO<sub>4</sub> (KDP) samples were performed by a Q-switched pulsed laser. The particle size range of the tested sample was 150–210  $\mu\text{m}$ , the laser wavelength was 1064 nm, the pulse duration was 10 ns, the pulse frequency was 1 Hz, and the laser spot area focused on the sample was 1.54 mm<sup>2</sup>. The energy of the laser emission was gradually increased during the measurement, and the LIDT of the sample was determined when it turned black under the laser.

## Syntheses

NaLu(SeO<sub>3</sub>)<sub>2</sub> was synthesized by mild temperature hydrothermal method. A mixture of Lu(NO<sub>3</sub>)<sub>3</sub>·6H<sub>2</sub>O (469.1 mg, 1 mmol), SeO<sub>2</sub> (444.4 mg, 4 mmol), Na<sub>2</sub>CO<sub>3</sub>(424.0 mg, 1 mmol) and H<sub>2</sub>O (5 ml) was sealed in an autoclave containing Teflon liner equipped (23 ml), heated at 225 °C for 5760 minutes, and then slowly cooled to room temperature in 4320 minutes. The products were separated by vacuum filtration, washed with alcohol and dried in air at room

temperature. The transparent needle-like  $\text{NaLu}(\text{SeO}_3)_2$  crystal was obtained in a single pure phase, with a yield of about 87% (based on Se), its purity was confirmed by X-ray diffraction (XRD) studies (Figure S1).

## S2. Single-crystal X-ray diffraction

Single crystal X-ray diffraction data were obtained on Agilent Technologies SuperNova dual-wavelength CCD diffractometer with a graphite-monochromated Mo  $K\alpha$  radiation ( $\lambda = 0.71073$  Å) at room temperature. Data reduction and cell refinement and were performed with *CrysAlisPro*. The structure was solved by the direct methods and refined by full-matrix least-squares fitting on  $F^2$  using *OLEX2-1.5* crystallographic software package<sup>3, 4</sup>. All atoms were refined with anisotropic thermal parameters. The structural data were also checked by PLATON and no higher symmetry was found<sup>5</sup>. The detailed crystallographic data was given in Table S1. The bond lengths were listed in Table S2<sup>6, 7</sup>.

## S3. Computational Method

Single-crystal structural data of  $\text{NaLu}(\text{SeO}_3)_2$  was used for the theoretical calculations. The electronic structures were performed using a plane-wave basis set and pseudo-potentials within density functional theory (DFT) implemented in the total-energy code CASTEP<sup>8</sup>. For the exchange and correlation functional, we chose Perdew–Burke–Ernzerhof (PBE) in the generalized gradient approximation (GGA). The interactions between the ionic cores and the electrons were described by the ultrasoft pseudopotential. The following valence-electron configurations were considered in the computation: Lu-4f<sup>14</sup>5d<sup>1</sup>6s<sup>2</sup>, Se-4s<sup>2</sup>4p<sup>4</sup>, O-2s<sup>2</sup>2p<sup>4</sup>, and

Na-2s<sup>2</sup>2p<sup>6</sup>3s<sup>1</sup>. The numbers of plane waves included in the basis sets were determined by cutoff energy of 900 eV. The numerical integration of the Brillouin zone was performed using Monkhorst-Pack k-point sampling of 2 × 3 × 5. The other parameters and convergent criteria were the default values of CASTEP code.

The calculations of linear optical properties in terms of the complex dielectric function  $\epsilon(\omega) = \epsilon_1(\omega) + i\epsilon_2(\omega)$  were made. The imaginary part of the dielectric function  $\epsilon_2$  was given in the following equation:

$$\epsilon_{ij}^2(\omega) = \frac{8\pi^2 h^2 e^2}{(m^2 V)} \sum_k \sum_{cv} (f_c - f_v) \frac{p_{cv}^i(k) p_{cv}^j(k)}{E_{vc}^2} \delta [E_c(k) - E_v(k) - \hbar\omega]$$

The  $f_c$  and  $f_v$  represent the Fermi distribution functions of the conduction and valence band.

The term  $p_{cv}^i(k)$  denotes the momentum matrix element transition from the energy level  $c$  of the conduction band to the level  $v$  of the valence band at the  $k$ th point in the Brillouin zone (BZ), and  $V$  is the volume of the unit cell.

The real part  $\epsilon_1(\omega)$  of the dielectric function  $\epsilon(\omega)$  follows from the Kramer–Kronig relationship.

All the other optical constants may be derived from  $\epsilon_1(\omega)$  and  $\epsilon_2(\omega)$ . For example, the refractive index  $n(\omega)$  can be calculated using the following expression<sup>9</sup>:

$$n(\omega) = \frac{1}{\sqrt{2}} [\sqrt{\epsilon_1^2(\omega) + \epsilon_2^2(\omega)} + \epsilon_1(\omega)]^{1/2}$$

**Table S1.** Summary of crystal data and structural refinements for NaLu(SeO<sub>3</sub>)<sub>2</sub> and NaGa(SeO<sub>3</sub>)<sub>2</sub>.

| molecular formula                                                                                                                                                                                                                                                  | NaLu(SeO <sub>3</sub> ) <sub>2</sub>              | NaGa(SeO <sub>3</sub> ) <sub>2</sub> <sup>10</sup> |
|--------------------------------------------------------------------------------------------------------------------------------------------------------------------------------------------------------------------------------------------------------------------|---------------------------------------------------|----------------------------------------------------|
| Formula Weight                                                                                                                                                                                                                                                     | 451.88                                            | 346.63                                             |
| crystal system                                                                                                                                                                                                                                                     | orthorhombic                                      | orthorhombic                                       |
| space group                                                                                                                                                                                                                                                        | <i>Pna2</i> <sub>1</sub>                          | <i>Pnma</i>                                        |
| Temperature(K)                                                                                                                                                                                                                                                     | 282.15                                            | 173.0(2)                                           |
| F(000)                                                                                                                                                                                                                                                             | 792.0                                             | N/A                                                |
| a/Å                                                                                                                                                                                                                                                                | 12.7180(5)                                        | 12.4545(2)                                         |
| b/Å                                                                                                                                                                                                                                                                | 8.3994(3)                                         | 5.29670(10)                                        |
| c/Å                                                                                                                                                                                                                                                                | 5.3750(2)                                         | 7.80440(10)                                        |
| α(deg)                                                                                                                                                                                                                                                             | 90                                                | 90                                                 |
| β(deg)                                                                                                                                                                                                                                                             | 90                                                | 90                                                 |
| γ(deg)                                                                                                                                                                                                                                                             | 90                                                | 90                                                 |
| V/Å <sup>3</sup>                                                                                                                                                                                                                                                   | 574.18(4)                                         | 514.839(14)                                        |
| Z                                                                                                                                                                                                                                                                  | 4                                                 | 4                                                  |
| Dc(g.cm <sup>-3</sup> )                                                                                                                                                                                                                                            | 5.227                                             | 4.472                                              |
| Flack                                                                                                                                                                                                                                                              | 0.14(2)                                           | N/A                                                |
| GOF on F <sup>2</sup>                                                                                                                                                                                                                                              | 1.000                                             | N/A                                                |
| R <sub>1</sub> , wR <sub>2</sub> [I > 2σ(I)] <sup>a</sup>                                                                                                                                                                                                          | R <sub>1</sub> = 0.0200, wR <sub>2</sub> = 0.0416 | R <sub>1</sub> = 0.0292                            |
| R <sub>1</sub> , wR <sub>2</sub> (all data) <sup>a</sup>                                                                                                                                                                                                           | R <sub>1</sub> = 0.0214, wR <sub>2</sub> = 0.0419 | R <sub>1</sub> = 0.0636                            |
| <sup>a</sup> R <sub>1</sub> = ∑  F <sub>o</sub>   -  F <sub>c</sub>   /∑ F <sub>o</sub>  , wR <sub>2</sub> = {∑w[(F <sub>o</sub> ) <sup>2</sup> - (F <sub>c</sub> ) <sup>2</sup> ] <sup>2</sup> /∑w[(F <sub>o</sub> ) <sup>2</sup> ] <sup>2</sup> } <sup>1/2</sup> |                                                   |                                                    |

**Table S2.** Calculated bond valences for NaLu(SeO<sub>3</sub>)<sub>2</sub>.

| Compound                             | Bond     | Bond     | Bond-valence | BVS   |
|--------------------------------------|----------|----------|--------------|-------|
|                                      |          | lengths  |              |       |
| NaLu(SeO <sub>3</sub> ) <sub>2</sub> | Se1-O1   | 1.692(6) | 1.379        | 4.132 |
|                                      | Se1-O2   | 1.684(5) | 1.410        |       |
|                                      | Se1-O3   | 1.702(6) | 1.343        |       |
|                                      | Se2-O4   | 1.672(7) | 1.456        | 4.138 |
|                                      | Se2-O5   | 1.723(6) | 1.269        |       |
|                                      | Se2-O6   | 1.683(6) | 1.413        |       |
|                                      | Na1-O1#1 | 2.898(7) | 0.051        | 0.896 |
|                                      | Na1-O2#1 | 2.515(7) | 0.145        |       |
|                                      | Na1-O3#2 | 2.542(7) | 0.135        |       |
|                                      | Na1-O4   | 2.514(8) | 0.145        |       |
|                                      | Na1-O4#3 | 2.961(9) | 0.043        |       |
|                                      | Na1-O6#4 | 2.383(8) | 0.207        |       |
|                                      | Na1-O6#3 | 2.455(8) | 0.170        | 2.986 |
|                                      | Lu1-O1#5 | 2.260(6) | 0.458        |       |
|                                      | Lu1-O2#6 | 2.236(5) | 0.489        |       |
|                                      | Lu1-O3   | 2.217(6) | 0.514        |       |
|                                      | Lu1-O4   | 2.220(7) | 0.510        |       |
|                                      | Lu1-O5#4 | 2.559(5) | 0.204        |       |
| Lu1-O5#7                             | 2.300(6) | 0.411    |              |       |
| Lu1-O6#4                             | 2.310(6) | 0.400    |              |       |

Symmetry transformations used to generate equivalent atoms:

For NaLu(SeO<sub>3</sub>)<sub>2</sub>: #1 -1/2+X,3/2-Y,-1+Z; #2 -1/2+X,3/2-Y,+Z; #3 1-X,2-Y,1/2+Z; #4 +X,+Y,1+Z; #5 +X,+Y,-1+Z; #6 3/2-X,1/2+Y,-1/2+Z; #7 1-X,1-Y,1/2+Z

**Table S3.** The reported non-hydrogen selenite compounds with thermal stability  $\geq 400^\circ\text{C}$ .

| Compounds                                                                                                          | Thermal stability | Ref.      | Compounds                                                                              | Thermal stability | Ref. |
|--------------------------------------------------------------------------------------------------------------------|-------------------|-----------|----------------------------------------------------------------------------------------|-------------------|------|
| HgCu(SeO <sub>3</sub> ) <sub>2</sub>                                                                               | 400 °C            | 11        | Cd <sub>6</sub> (PO <sub>4</sub> ) <sub>1.34</sub> (SeO <sub>3</sub> ) <sub>4.66</sub> | 485 °C            | 12   |
| Ag <sub>5</sub> Bi(SeO <sub>3</sub> ) <sub>4</sub>                                                                 | 400 °C            | 13        | LiBa <sub>3</sub> Bi <sub>6</sub> (SeO <sub>3</sub> ) <sub>7</sub> F <sub>11</sub>     | 485 °C            | 14   |
| A <sub>2</sub> Bi <sub>2</sub> (SeO <sub>3</sub> ) <sub>3</sub> F <sub>2</sub> (A=K, Rb)                           | 400 °C            | 15        | YVSe <sub>2</sub> O <sub>8</sub>                                                       | 500 °C            | 16   |
| Pb <sub>2</sub> GaF <sub>2</sub> (SeO <sub>3</sub> ) <sub>2</sub> Cl                                               | 400 °C            | 17        | Bi <sub>2</sub> F <sub>2</sub> (MoO <sub>4</sub> )(SeO <sub>3</sub> )                  | 510 °C            | 18   |
| PbMo <sub>2</sub> O <sub>5</sub> (SeO <sub>3</sub> ) <sub>2</sub>                                                  | 400 °C            | 19        | Pb <sub>2</sub> Cd(SeO <sub>3</sub> ) <sub>2</sub> Br <sub>2</sub>                     | 510 °C            | 20   |
| Cs(TiOF) <sub>3</sub> (SeO <sub>3</sub> ) <sub>2</sub>                                                             | 402 °C            | 21        | Pb <sub>2</sub> Cd(SeO <sub>3</sub> ) <sub>2</sub> Cl <sub>2</sub>                     | 516 °C            | 20   |
| Sr(VO <sub>2</sub> F)(SeO <sub>3</sub> )                                                                           | 405 °C            | 22        | Pb <sub>3</sub> (SeO <sub>3</sub> ) <sub>2</sub> Br <sub>2</sub>                       | 530 °C            | 23   |
| Na <sub>2</sub> Nb <sub>4</sub> O <sub>7</sub> (SeO <sub>3</sub> ) <sub>4</sub>                                    | 417 °C            | 24        | Lu <sub>3</sub> F(SeO <sub>3</sub> ) <sub>4</sub>                                      | 550 °C            | 25   |
| BiGa(SeO <sub>3</sub> ) <sub>3</sub>                                                                               | 420 °C            | 26        | Ba <sub>2</sub> Zn(SeO <sub>3</sub> ) <sub>2</sub> Cl <sub>2</sub>                     | 550 °C            | 27   |
| Pb <sub>2</sub> GaF <sub>2</sub> (SeO <sub>3</sub> ) <sub>2</sub> Br                                               | 425 °C            | 28        | BaZn <sub>2</sub> (SeO <sub>3</sub> ) <sub>2</sub> Cl <sub>2</sub>                     | 550 °C            | 27   |
| Na <sub>3</sub> Ti <sub>3</sub> O <sub>3</sub> (SeO <sub>3</sub> ) <sub>4</sub> F                                  | 430 °C            | 29        | CsY(SeO <sub>3</sub> ) <sub>2</sub>                                                    | 570 °C            | 30   |
| Ag <sub>3</sub> Ti <sub>3</sub> O <sub>3</sub> (SeO <sub>3</sub> ) <sub>4</sub> F                                  | 430 °C            | 29,<br>31 | <b>NaLu(SeO<sub>3</sub>)<sub>2</sub></b>                                               | <b>~575 °C</b>    | *    |
| LiGa(SeO <sub>3</sub> ) <sub>2</sub>                                                                               | 430 °C            | 10        | Cd <sub>2</sub> (SeO <sub>3</sub> )F <sub>2</sub>                                      | 580 °C            | 32   |
| NaGa(SeO <sub>3</sub> ) <sub>2</sub>                                                                               | 430 °C            | 10        | FeNd <sub>2</sub> (SeO <sub>3</sub> ) <sub>4</sub> Cl                                  | 600 °C            | 33   |
| KGa(SeO <sub>3</sub> ) <sub>2</sub>                                                                                | 430 °C            | 10        | Li <sub>6</sub> Co(SeO <sub>3</sub> ) <sub>4</sub>                                     | 600 °C            | 34   |
| CsGa(SeO <sub>3</sub> ) <sub>2</sub>                                                                               | 430 °C            | 10        | Li <sub>6</sub> Ni(SeO <sub>3</sub> ) <sub>4</sub>                                     | 600 °C            | 34   |
| Pb <sub>2</sub> NbO <sub>2</sub> (SeO <sub>3</sub> ) <sub>2</sub> Br                                               | 431 °C            | 28        | Li <sub>2</sub> Zn(SeO <sub>3</sub> ) <sub>2</sub>                                     | 600 °C            | 34   |
| Hg <sub>3</sub> (SeO <sub>3</sub> ) <sub>2</sub> (SeO <sub>4</sub> )                                               | 439 °C            | 35        | NaSc(SeO <sub>3</sub> ) <sub>2</sub>                                                   | 600 °C            | 36   |
| Sr <sub>4</sub> (VO <sub>2</sub> ) <sub>2</sub> (SeO <sub>3</sub> ) <sub>4</sub> (Se <sub>2</sub> O <sub>5</sub> ) | 440 °C            | 37        | CsSc(SeO <sub>3</sub> ) <sub>2</sub>                                                   | 600 °C            | 36   |
| BiFe(SeO <sub>3</sub> ) <sub>3</sub>                                                                               | 445 °C            | 38        | RbSc(SeO <sub>3</sub> ) <sub>2</sub>                                                   | 620 °C            | 36   |
| Zn <sub>2</sub> (SeO <sub>3</sub> )F <sub>2</sub>                                                                  | 450 °C            | 32        | AY(SeO <sub>3</sub> ) <sub>2</sub> (A=K,<br>Rb)                                        | 620 °C            | 30   |
| Na <sub>6</sub> (W <sub>6</sub> O <sub>19</sub> )(SeO <sub>3</sub> ) <sub>2</sub>                                  | 450 °C            | 39        | CaYF(SeO <sub>3</sub> ) <sub>2</sub>                                                   | 625 °C            | 40   |
| Bi <sub>2</sub> (SeO <sub>3</sub> ) <sub>2</sub> (SeO <sub>4</sub> )                                               | 450 °C            | 41        | KSc(SeO <sub>3</sub> ) <sub>2</sub>                                                    | 640 °C            | 36   |
| CdCu(SeO <sub>3</sub> ) <sub>2</sub>                                                                               | 459 °C            | 11        | KNb <sub>3</sub> Se <sub>2</sub> O <sub>12</sub>                                       | 690 °C            | 24   |
| CdPb <sub>8</sub> (SeO <sub>3</sub> ) <sub>4</sub> Cl <sub>4</sub> Br <sub>6</sub>                                 | 470 °C            | 42        | Y <sub>3</sub> F(SeO <sub>3</sub> ) <sub>4</sub>                                       | 690 °C            | 40   |
| Ba <sub>3</sub> Bi <sub>6.5</sub> (SeO <sub>3</sub> ) <sub>7</sub> F <sub>10.5</sub> O <sub>0.5</sub>              | 477 °C            | 14        | Li <sub>6</sub> Cd(SeO <sub>3</sub> ) <sub>4</sub>                                     | ~700 °C           | 34   |
| Cd <sub>3</sub> (SeO <sub>3</sub> ) <sub>2</sub> (SeO <sub>4</sub> )                                               | 482 °C            | 35        | Cs(TaO <sub>2</sub> ) <sub>3</sub> (SeO <sub>3</sub> ) <sub>2</sub>                    | ~700 °C           | 21   |
| <b>*This work.</b>                                                                                                 |                   |           |                                                                                        |                   |      |



**Table S4.** The reported non-hydrogen pure selenite NLO crystals with  $E_g > 4.2$  eV.

| Compounds                                         | Space group                    | SHG efficiency   | $E_g$ (eV) | Thermal stability | Ref.     |
|---------------------------------------------------|--------------------------------|------------------|------------|-------------------|----------|
| RbScSe <sub>2</sub> O <sub>6</sub>                | <i>P6<sub>3</sub>mc</i>        | 1 × ADP          | 4.9        | 620 °C            | 36       |
| NaY(SeO <sub>3</sub> ) <sub>2</sub>               | <i>Pna2<sub>1</sub></i>        | 1 × ADP          | 4.6        | 325 °C            | 30       |
| RbSb <sub>3</sub> Se <sub>2</sub> O <sub>12</sub> | <i>P6<sub>3</sub>mc</i>        | 1 × KDP          | 4.27       | 325 °C            | 43       |
| KSb <sub>3</sub> Se <sub>2</sub> O <sub>12</sub>  | <i>P6<sub>3</sub>mc</i>        | 1.3 × KDP        | 4.46       | 325 °C            | 43       |
| CsSb <sub>3</sub> Se <sub>2</sub> O <sub>12</sub> | <i>P6<sub>3</sub>mc</i>        | 1.6 × KDP        | 4.21       | 570 °C            | 43       |
| <b>NaLu(SeO<sub>3</sub>)<sub>2</sub></b>          | <b><i>Pna2<sub>1</sub></i></b> | <b>2.7 × KDP</b> | <b>5.3</b> | <b>~575 °C</b>    | <b>*</b> |
| <b>*This work.</b>                                |                                |                  |            |                   |          |

**Table S5.** State energies (eV) of the lowest conduction band (L-CB) and the highest valence band (H-VB) of NaLu(SeO<sub>3</sub>)<sub>2</sub>.

| Compound                             | k-point                  | L-CB     | H-VB     |
|--------------------------------------|--------------------------|----------|----------|
| NaLu(SeO <sub>3</sub> ) <sub>2</sub> | G (0.000, 0.000, 0.000)  | 4.315597 | -0.10334 |
|                                      | Z (0.000, 0.000, 0.500)  | 4.581841 | -0.10172 |
|                                      | T (-0.500, 0.000, 0.500) | 4.563254 | -0.16705 |
|                                      | Y (-0.500, 0.000, 0.000) | 4.311262 | -0.12579 |
|                                      | S (-0.500, 0.500, 0.000) | 4.386441 | -0.18561 |
|                                      | X (0.000, 0.500, 0.000)  | 4.335269 | -0.21557 |
|                                      | U (0.000, 0.500, 0.500)  | 4.370892 | -0.01151 |
|                                      | R (-0.500, 0.500, 0.500) | 4.324554 | 0        |

**Table S6.** Calculation of the dipole moments of the  $\text{SeO}_3$  and the net dipole moment of a unit cell of  $\text{NaGa}(\text{SeO}_3)_2$  and  $\text{NaLu}(\text{SeO}_3)_2$ . (D = Debyes).

| NaGa(SeO <sub>3</sub> ) <sub>2</sub>     |                   |             |             |             |
|------------------------------------------|-------------------|-------------|-------------|-------------|
| Polar unit                               | Dipole moment (D) |             |             |             |
|                                          | total magnitude   | x-component | y-component | z-component |
| Se(1)O <sub>3</sub>                      | 9.355             | 9.304       | 0           | 0.971       |
|                                          | 9.355             | 9.304       | 0           | -0.971      |
|                                          | 9.355             | -9.304      | 0           | 0.971       |
|                                          | 9.355             | -9.304      | 0           | -0.971      |
| Net dipole moment of Se(1)O <sub>3</sub> | 0                 | 0           | 0           | 0           |
| 0.5 × Se(2)O <sub>3</sub>                | 10.387            | 7.484       | 0           | 7.203       |
|                                          | 10.390            | -7.487      | 0           | -7.205      |
|                                          | 10.390            | 7.487       | 0           | 7.205       |
|                                          | 10.387            | -7.484      | 0           | -7.203      |
| Se(2)O <sub>3</sub>                      | 10.385            | 7.482       | 0           | -7.203      |
|                                          | 10.385            | -7.482      | 0           | 7.203       |
| Net dipole moment of Se(2)O <sub>3</sub> | 0                 | 0           | 0           | 0           |
| Net dipole moment (a unit cell)          | 0                 | 0           | 0           | 0           |
| NaLu(SeO <sub>3</sub> ) <sub>2</sub>     |                   |             |             |             |
| Polar unit                               | Dipole moment (D) |             |             |             |
|                                          | total magnitude   | x-component | y-component | z-component |
| Se(1)O <sub>3</sub>                      | 9.015             | 6.726       | 5.924       | -0.964      |
|                                          | 9.016             | -6.727      | 5.924       | -0.963      |
|                                          | 9.011             | -6.723      | -5.922      | -0.964      |
|                                          | 9.016             | 6.727       | -5.924      | -0.963      |
| Net dipole moment of Se(1)O <sub>3</sub> | 3.854             | 0.003       | 0.002       | -3.854      |
| Se(2)O <sub>3</sub>                      | 9.812             | -9.809      | -0.021      | -0.243      |
|                                          | 9.812             | 9.809       | 0.021       | -0.242      |
|                                          | 9.812             | -9.809      | 0.021       | -0.243      |
|                                          | 9.812             | 9.809       | -0.021      | -0.242      |
| Net dipole moment of Se(2)O <sub>3</sub> | 0.969             | 0           | 0           | -0.969      |
| Net dipole moment (a unit cell)          | 4.823             | 0.003       | 0.002       | -4.823      |

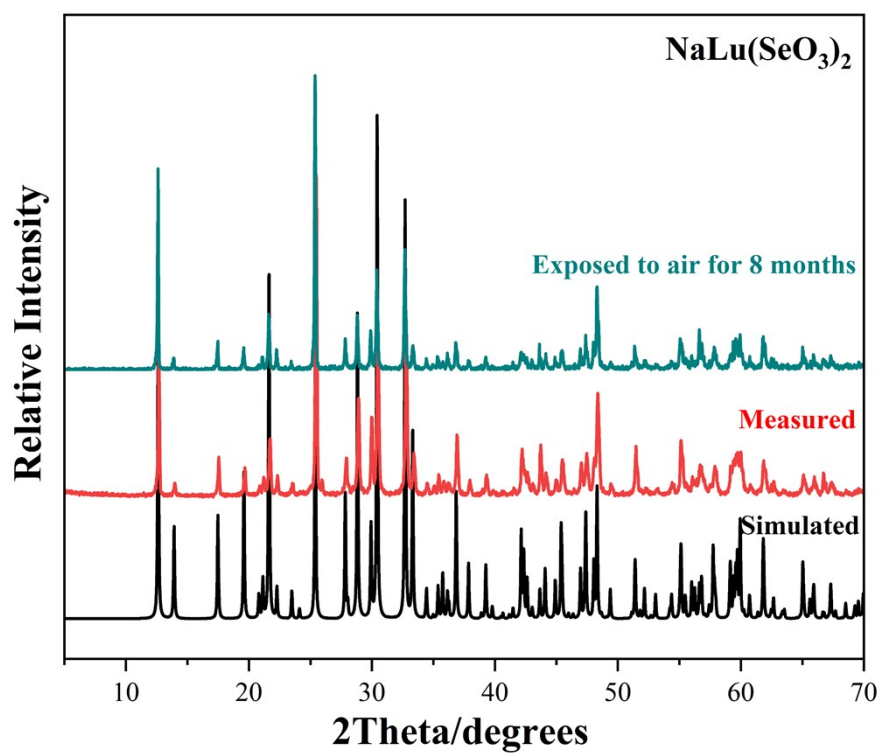

**Figure S1.** Simulated and experimental powder X-ray diffractometer patterns of  $\text{NaLu}(\text{SeO}_3)_2$ .

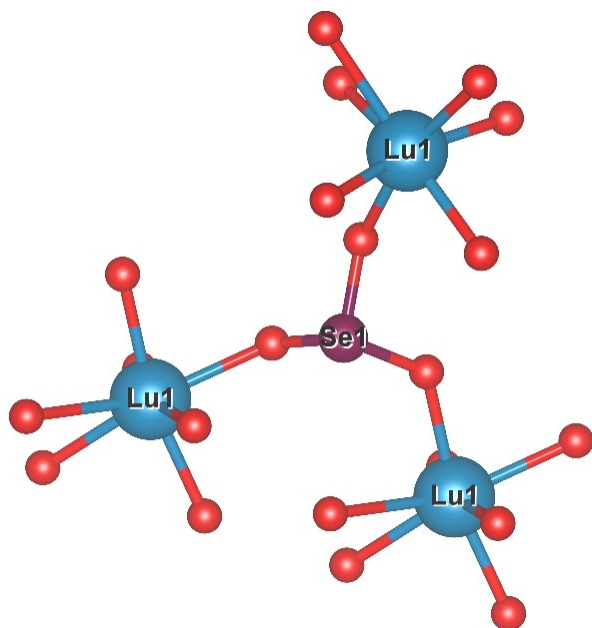

(a)

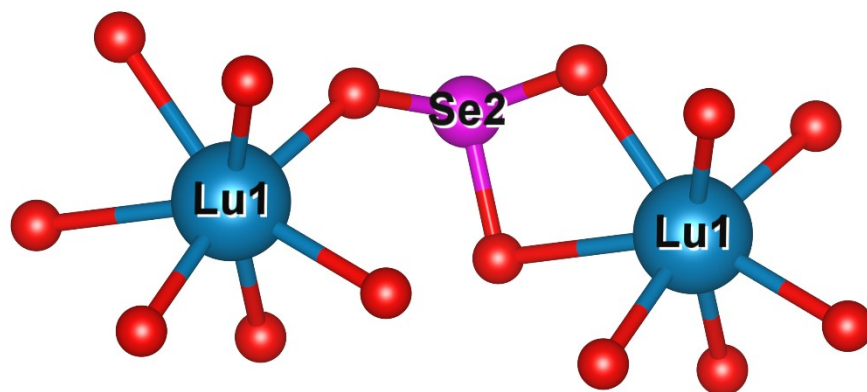

(b)

**Figure S2.** The coordination environments of Se(1)O<sub>3</sub> group (a) and Se(2)O<sub>3</sub> (b) in NaLu(SeO<sub>3</sub>)<sub>2</sub>.

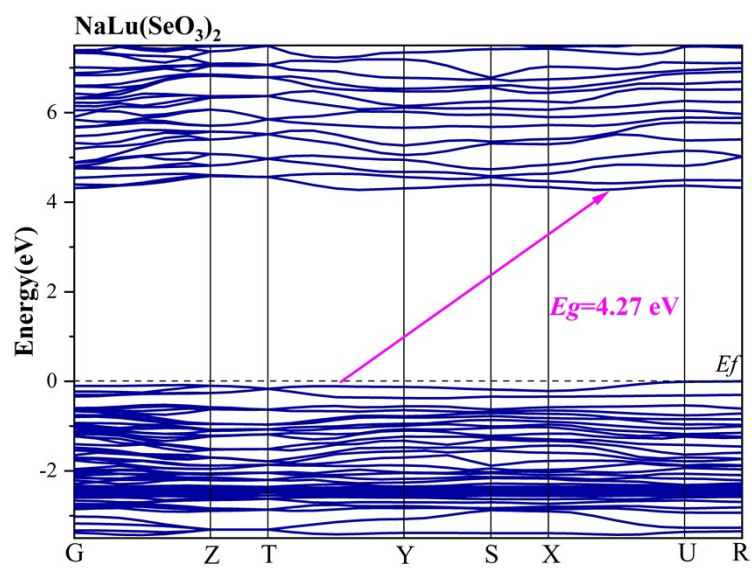

**Figure S3.** The band structure of NaLu(SeO<sub>3</sub>)<sub>2</sub>.

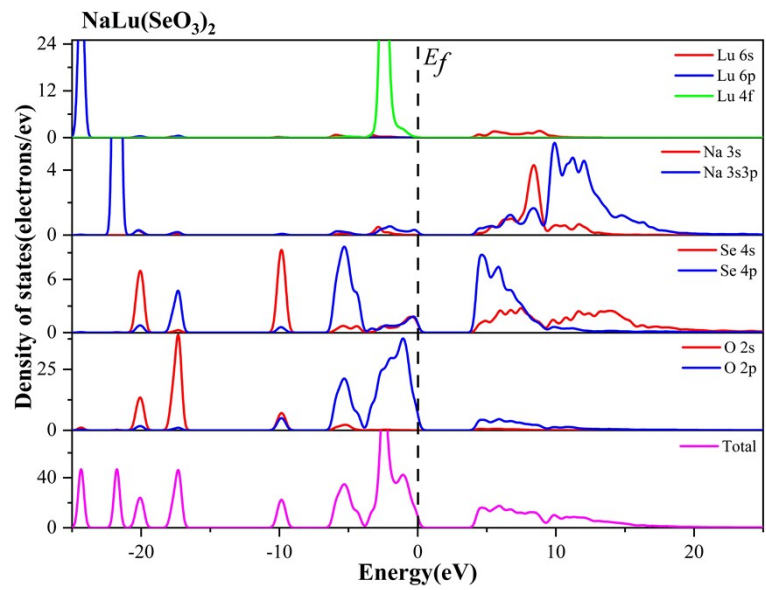

**Figure S4.** The total and partial density of states for NaLu(SeO<sub>3</sub>)<sub>2</sub>.

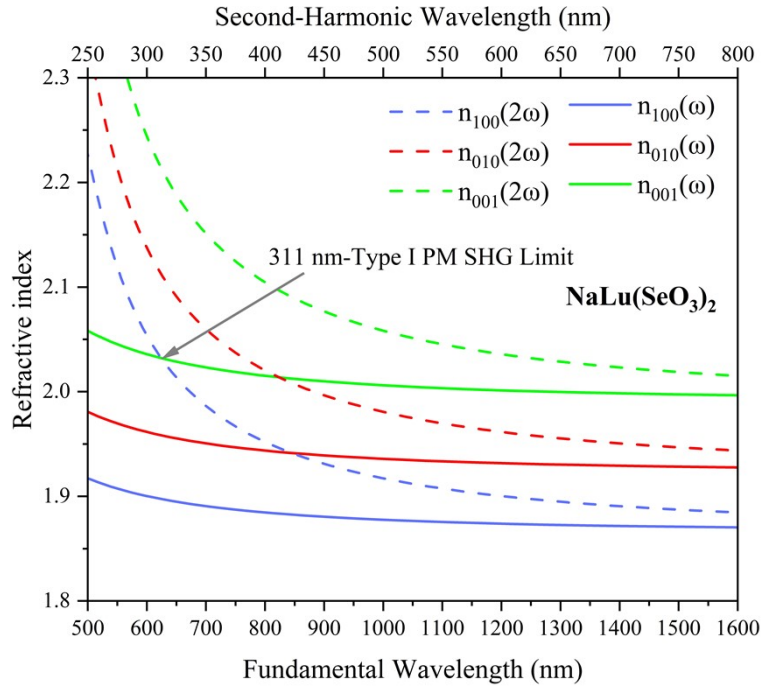

**Figure S5.** Calculated refractive index dispersion curves and the predicted shortest type I phase-matching (PM) SHG wavelength of NaLu(SeO<sub>3</sub>)<sub>2</sub>.



## References

1. P. Kubelka and F. Munk, *Technol. Physical* 1931, **12**, 259–274.
2. S. K. Kurtz and T. T. Perry, *J. Appl. Phys.*, 1968, **39**, 3798-3813.
3. O. V. Dolomanov, L. J. Bourhis, R. J. Gildea, J. A. K. Howard and H. Puschmann, *J. Appl. Cryst.*, 2009, **42**, 339-341.
4. G. M. Sheldrick, *Acta Cryst.*, 2015, **C71**, 3-8.
5. A. L. Spek, *J. Appl. Cryst.*, 2003, **36**, 7–13.
6. B. I. D. BROWN and D. ALTERMATr, *Acta Cryst.*, 1985, **B41**, 244-247.
7. B. N. E. BRESE and M. O'KEEFFE, *Acta Cryst.*, 1991, **B47**, 192-197.
8. S. J. Clark, M. D. Segall, C. J. Pickard, P. J. Hasnip, M. I. J. Probert, K. Refson and M. C. Payne, *Z Kristallogr*, 2005, **220**, 567-570.
9. D. Vanderbilt, *Phys. Rev. B*, 1990, **41**, 7892-7895.
10. D. W. Lee and K. M. Ok, *Inorg. Chem.*, 2013, **52**, 5176-5184.
11. X. L. Cao, F. Kong, Z. Z. He and J. G. Mao, *Dalton Trans.*, 2015, **44**, 11420-11428.
12. Y. X. Ma, Y. P. Gong, C. L. Hu, J. G. Mao and F. Kong, *Inorg. Chem.*, 2018, **262**, 320-326.
13. X. X. Wang, X. B. Li, C. L. Hu, F. Kong and J. G. Mao, *Sci. China. Mater.*, 2019, **62**, 1821-1830.
14. S. S. Shi, C. S. Lin, D. Zhao, M. Luo, L. L. Cao, G. Peng and N. Ye, *Chem. Commun.*, 2021, **57**, 2982-2985.
15. S. S. Shi, C. S. Lin, G. S. Yang, L. L. Cao, B. X. Li, T. Yan, M. Luo and N. Ye, *Chem. Mater.*, 2020, **32**, 7958-7964.
16. Y. H. Kim, D. W. Lee and K. M. Ok, *Inorg. Chem.*, 2014, **53**, 1250-1256.
17. F. G. You, F. Liang, Q. Huang, Z. G. Hu, Y. C. Wu and Z. S. Lin, *J. Am. Chem. Soc.*, 2019, **141**, 748-752.
18. Y. P. Gong, C. L. Hu, F. Kong and J. G. Mao, *Chem. Eur.J.*, 2019, **25**, 3685-3694.
19. S. J. Oh, D. W. Lee and K. M. Ok, *Inorg. Chem.*, 2012, **51**, 5393-5399.
20. Y. P. Gong, C. L. Hu, Y. X. Ma, J. G. Mao and F. Kong, *Inorg. Chem. Front.*, 2019, **6**, 3133-3139.
21. X. L. Cao, C. L. Hu, F. Kong and J. G. Mao, *Inorg. Chem.*, 2015, **54**, 3875-3882.

22. M. L. Liang, Y. X. Ma, C. L. Hu, F. Kong and J. G. Mao, *Dalton Trans.*, 2018, **47**, 1513-1519.
23. X. X. Wang, X. X. Jiang, H. M. Liu, L. Yang, Z. S. Lin, Z. G. Hu, X. G. Meng, X. G. Chen and J. G. Qin, *Dalton Trans.*, 2018, **47**, 1911-1917.
24. X. L. Cao, C. L. Hu, F. Kong and J. G. Mao, *Inorg. Chem.*, 2015, **54**, 10978-10984.
25. C. Wu, L. H. Li, L. Lin, Z. P. Huang, M. G. Humphrey and C. Zhang, *Chem. Mater.*, 2020, **32**, 3043-3053.
26. Y. X. Ma, Y. P. Gong, C. L. Hu, F. Kong and J. G. Mao, *Inorg. Chem.*, 2020, **59**, 7852-7859.
27. Q. Li, L. Geng, H.-Y. Lu, K. Dai and W.-D. Cheng, *J. Solid State Chem.*, 2018, **265**, 117-122.
28. H. Zhao, P. Gong, X. Zhang, Z. Lin, Z. Hu and Y. Wu, *Dalton Trans.*, 2020, **49**, 14046-14051.
29. S. N. Yan, X. X. Wang, C. L. Hu, B. X. Li, F. Kong and J. G. Mao, *Inorg. Chem.*, 2022, **61**, 2686-2694.
30. S. E. Bang, D. W. Lee and K. M. Ok, *Inorg. Chem.*, 2014, **53**, 4756-4762.
31. Q. Qian, F. Kong and J. G. Mao, *RSC Adv.*, 2016, **6**, 79681-79687.
32. F. You, P. Gong, F. Liang, X. Jiang, H. Tu, Y. Zhao, Z. Hu and Z. Lin, *CrystEngComm*, 2019, **21**, 2485-2489.
33. Y. Xie, Z. He, W. Zhang, Z. Zhao, M. Zhang and X. Huang, *J. Solid State Chem.*, 2020, **286**.
34. H. Jo, S. Lee, K. Y. Choi and K. M. Ok, *Inorg. Chem.*, 2018, **57**, 3465-3473.
35. M. Shang and P. S. Halasyamani, *J. Solid State Chem.*, 2020, **286**, 121292.
36. S. Y. Song and K. M. Ok, *Inorg. Chem.*, 2015, **54**, 5032-5038.
37. J. Yeon, S. H. Kim, S. D. Nguyen, H. Lee and P. S. Halasyamani, *Inorg. Chem.*, 2012, **51**, 609-619.
38. S. Y. Zhang, C. L. Hu, P. X. Li, H. L. Jiang and J. G. Mao, *Dalton Trans.*, 2012, **41**, 9532-9542.
39. S. D. Nguyen and P. S. Halasyamani, *Inorg. Chem.*, 2013, **52**, 2637-2647.

40. P. F. Li, C. L. Hu, F. Kong and J. G. Mao, *Angew. Chem. Int. Ed.*, 2023, **62**, e202301420.
41. E. P. Lee, S. Y. Song, D. W. Lee and K. M. Ok, *Inorg. Chem.*, 2013, **52**, 4097-4103.
42. M. Shang and P. S. Halasyamani, *J. Solid State Chem.*, 2020, **282**, 121121.
43. R. Robert, V. Balisetty, K. Mohanrao, M. Mannamala, S. Mangalassery, D. N. Rao and K. Vidyasagar, *Inorg. Chem.*, 2023, **62**, 7890-7897.
